# Supplementary material
Source: PubMed Central journal article supplement (PMC4374744)
Supplement: NIHMS669314-supplement-Supplemental_2.pdf [file NIHMS669314-supplement-Supplemental_2.pdf]

## Supplementary Online Content

Holcomb JB, Tilley BC, Baraniuk S, et al; for the PROPPR Study Group. Transfusion of plasma, platelets, and red blood cells in a 1:1:1 vs a 1:1:2 ratio and mortality in patients with severe trauma: the PROPPR randomized clinical trial. *JAMA*. doi:10.1001/jama.2015.12

**eTable 1.** 30-day primary outcomes by treatment group: a sensitivity analysis under the intent-to-treat principle

**eTable 2.** Resuscitation products by treatment group up to 24 hours after admission

**eFigure.** Total blood products transfused up to 24 hours after admission by treatment group

This supplementary material has been provided by the authors to give readers additional information about their work.

**eTable 1.** 30-Day Primary Outcomes by Treatment Group: A Sensitivity Analysis Under the Intent-to-Treat Principle<sup>1</sup>

| <b>Imputation</b> | <b>Group 1:1:1<br/>(xxx)</b> | <b>Group 1:1:2<br/>(x)</b> |       | <b>Group 1:1:1<br/>(N = 338)</b> | <b>Group 1:1:2<br/>(N = 342)</b> | <b>Difference in %<br/>(95% CI)</b> | <b>Adj RR (95% CI);<br/>p-value<sup>2</sup></b> |
|-------------------|------------------------------|----------------------------|-------|----------------------------------|----------------------------------|-------------------------------------|-------------------------------------------------|
| Combination       | (111)                        | (0)                        | n (%) | 75 (22.2)                        | 90 (26.3)                        | -4.1 ( -10.6, 2.3 )                 | 0.84 (0.64, 1.10); 0.21                         |
| Combination       | (111)                        | (1)                        | n (%) | 75 (22.2)                        | 89 (26.0)                        | -3.8 ( -10.3, 2.6 )                 | 0.85 (0.65, 1.11); 0.24                         |
| Combination       | (110)                        | (0)                        | n (%) | 76 (22.5)                        | 90 (26.3)                        | -3.8 ( -10.3, 2.6 )                 | 0.85 (0.65, 1.11); 0.24                         |
| Combination       | (011)                        | (0)                        | n (%) | 76 (22.5)                        | 90 (26.3)                        | -3.8 ( -10.3, 2.6 )                 | 0.85 (0.65, 1.11); 0.24                         |
| Combination       | (101)                        | (0)                        | n (%) | 76 (22.5)                        | 90 (26.3)                        | -3.8 ( -10.3, 2.6 )                 | 0.85 (0.65, 1.11); 0.24                         |
| Combination       | (110)                        | (1)                        | n (%) | 76 (22.5)                        | 89 (26.0)                        | -3.5 ( -10.0, 2.9 )                 | 0.86 (0.66, 1.13); 0.28                         |
| Combination       | (011)                        | (1)                        | n (%) | 76 (22.5)                        | 89 (26.0)                        | -3.5 ( -10.0, 2.9 )                 | 0.86 (0.66, 1.13); 0.28                         |
| Combination       | (101)                        | (1)                        | n (%) | 76 (22.5)                        | 89 (26.0)                        | -3.5 ( -10.0, 2.9 )                 | 0.86 (0.66, 1.13); 0.28                         |
| Combination       | (100)                        | (0)                        | n (%) | 77 (22.8)                        | 90 (26.3)                        | -3.5 ( -10.0, 2.9 )                 | 0.86 (0.66, 1.13); 0.28                         |
| Combination       | (010)                        | (0)                        | n (%) | 77 (22.8)                        | 90 (26.3)                        | -3.5 ( -10.0, 2.9 )                 | 0.86 (0.66, 1.13); 0.28                         |
| Combination       | (001)                        | (0)                        | n (%) | 77 (22.8)                        | 90 (26.3)                        | -3.5 ( -10.0, 2.9 )                 | 0.86 (0.66, 1.13); 0.28                         |
| Combination       | (100)                        | (1)                        | n (%) | 77 (22.8)                        | 89 (26.0)                        | -3.2 ( -9.7, 3.2 )                  | 0.87 (0.67, 1.14); 0.32                         |
| Combination       | (010)                        | (1)                        | n (%) | 77 (22.8)                        | 89 (26.0)                        | -3.2 ( -9.7, 3.2 )                  | 0.87 (0.67, 1.14); 0.32                         |
| Combination       | (001)                        | (1)                        | n (%) | 77 (22.8)                        | 89 (26.0)                        | -3.2 ( -9.7, 3.2 )                  | 0.87 (0.67, 1.14); 0.32                         |
| Combination       | (000)                        | (0)                        | n (%) | 78 (23.1)                        | 90 (26.3)                        | -3.2 ( -9.7, 3.2 )                  | 0.88 (0.67, 1.14); 0.32                         |
| Combination       | (000)                        | (1)                        | n (%) | 78 (23.1)                        | 89 (26.0)                        | -2.9 ( -9.4, 3.5 )                  | 0.89 (0.68, 1.15); 0.37                         |

<sup>1</sup> The table shows the frequency, proportion, difference in proportion of deaths, and adjusted RR for each of 16 possible combinations of 30-day mortality outcomes for the 4 patients with missing values (0=dead, 1= alive). There were 3 missing in the 1:1:1 group and 1 missing in the 1:1:2 group.

<sup>2</sup> Mantel-Haenszel test for binary outcomes measured from randomization, adjusting for site.

**eTable 2.** Resuscitation Products by Treatment Group up to 24 hours after Admission

| <b>Resuscitation up to 24 hours after Admission<sup>1</sup></b> |           | <b>Group 1:1:1<br/>(N = 338)</b> | <b>Group 1:1:2<br/>(N = 342)</b> | <b>p-value<sup>2</sup></b> |
|-----------------------------------------------------------------|-----------|----------------------------------|----------------------------------|----------------------------|
| Plasma (units)                                                  | Median    | 7 (3,13)                         | 5 (2,10)                         | <.001                      |
|                                                                 | >0, n (%) | 325 (96.2)                       | 320 (93.6)                       |                            |
| Platelets (units) <sup>3</sup>                                  | Median    | 12 (6,18)                        | 6 (0,12)                         | <.001                      |
|                                                                 | >0, n (%) | 333 (98.5)                       | 205 (59.9)                       |                            |
| RBC (units)                                                     | Median    | 9 (5,15)                         | 9 (6,16)                         | 0.30                       |
|                                                                 | >0, n (%) | 338 (100)                        | 341 (99.7)                       |                            |
| Cryoprecipitate (units)                                         | Median    | 0 (0,0)                          | 0 (0,9)                          | 0.01                       |
|                                                                 | >0, n (%) | 73 (21.6)                        | 100 (29.2)                       |                            |
| Crystalloids (liters)                                           | Median    | 6.3 (3.8,9.5)                    | 6.6 (3.5,10.5)                   | 0.58                       |
|                                                                 | >0, n (%) | 333 (98.5)                       | 338 (98.8)                       |                            |
| Colloids (liters)                                               | Median    | 0 (0,0.3)                        | 0 (0,0.3)                        | 0.70                       |
|                                                                 | >0, n (%) | 90 (26.6)                        | 88 (25.7)                        |                            |
| Tranexamic Acid (TXA)                                           | >0, n (%) | 64 (18.9)                        | 68 (19.9)                        |                            |
| Other Procoagulants                                             | >0, n (%) | 19 (5.6)                         | 15 (4.4)                         |                            |

<sup>1</sup> For all Medians in table, numbers in parentheses represent the 25<sup>th</sup> and 75<sup>th</sup> percentiles

<sup>2</sup> van Elteren test for medians, adjusting for site

<sup>3</sup> Five or 6 unit pools of whole blood-derived platelets were considered equivalent to a unit of apheresis platelets (e.g., an adult dose of platelets).

**eFigure.** Total Blood Products Transfused up to 24 hours after Admission by Treatment Group

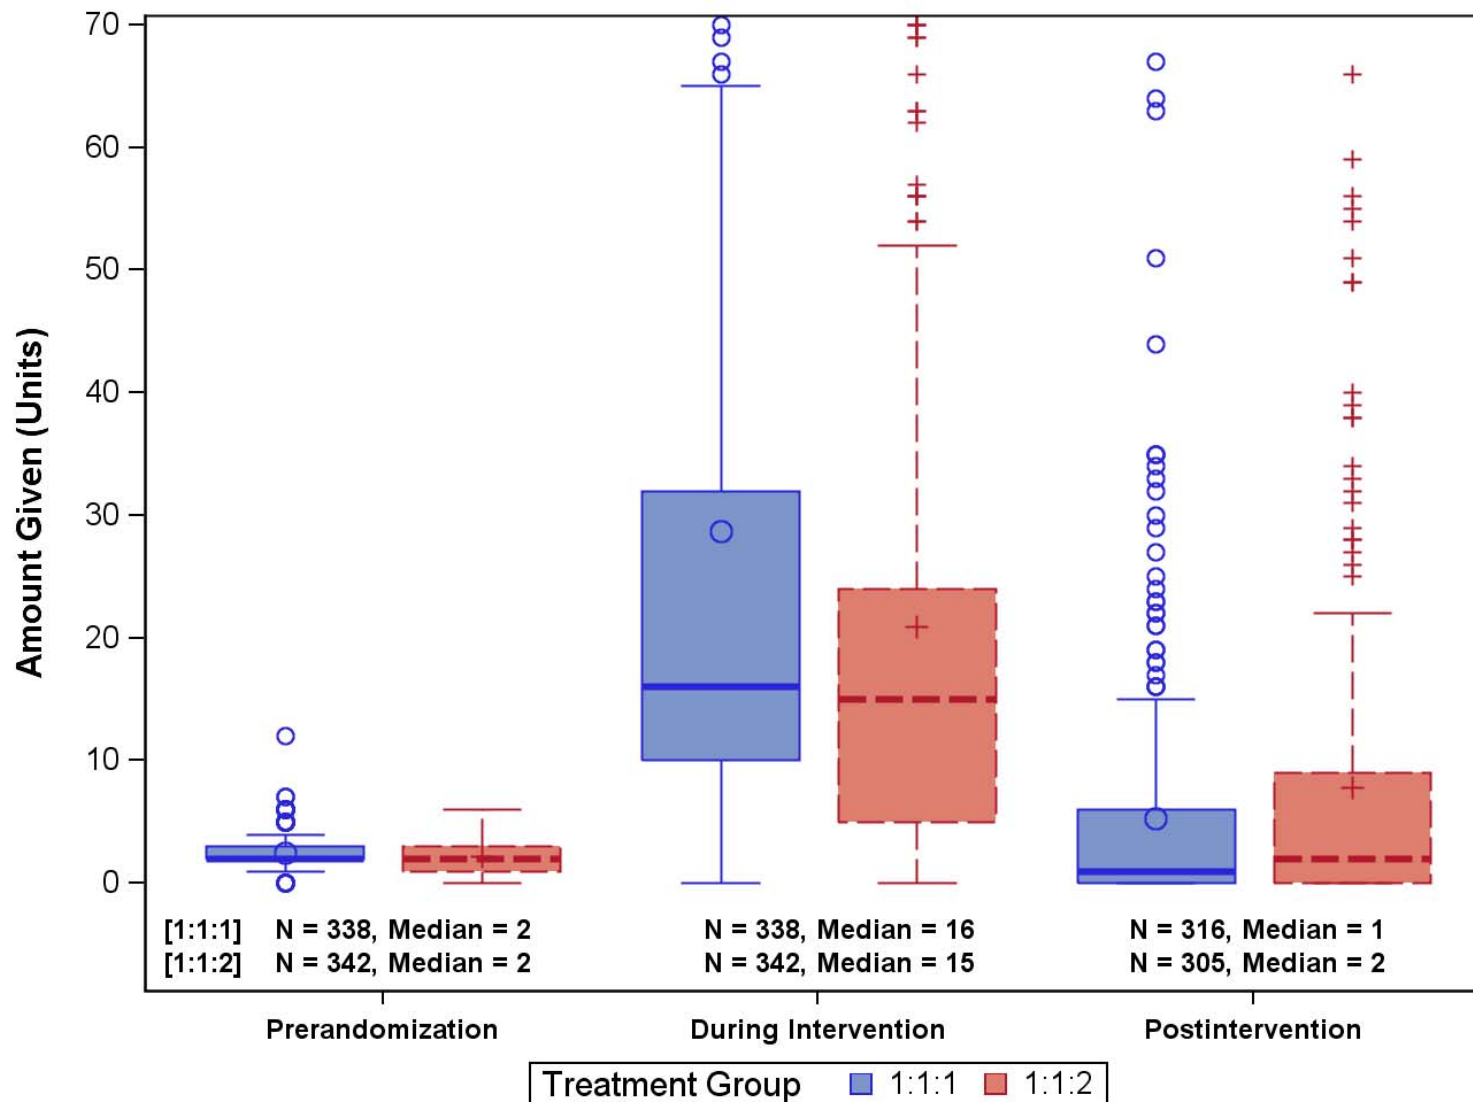

1 Prerandomization blood products include those given pre-hospital.

2 The conventions of this boxplot are as follows: The lower and upper edges of the boxes are the 25th and 75th percentiles, the whiskers extend to  $\pm 1.5 \times$  interquartile range (IQR), and the points outside are the outliers. The thick line inside the box represents the median and symbol is the mean.

3 Five or six unit pools of whole blood-derived platelets were considered equivalent to a unit of apheresis platelets (e.g., an adult dose of platelets).
